# Supplementary material for: FABP5, a Novel Immune-Related mRNA Prognostic Marker and a Target of Immunotherapy for Multiple Myeloma
Source: Front Med (Lausanne). 2021 Jun 24;8:667525. doi: 10.3389/fmed.2021.667525 (PMC8266212; doi:10.3389/fmed.2021.667525)
Supplement: Supplementary Table 2 — One hundred and thirty-nine abnormally expressed immune-related mRNAs for multiple myeloma in the GSE6477 dataset. [file Table_2.XLSX]

## Sheet: Sheet1
ID	logFC	AveExpr	t	P.Value	adj.P.Val	B
IGHD	-4.92375	10.4087	-9.20784	1.32371e-15	1.83499e-13	24.9956
IGLJ3	-4.38659	10.1957	-11.0872	4.25986e-20	1.57473e-17	35.1622
ELANE	-3.88425	5.8086	-10.5192	9.80334e-19	2.17438e-16	32.0794
IGHM	-3.86505	11.584	-7.70354	4.21365e-12	1.73072e-10	17.0821
LYZ	-3.82153	7.26916	-6.66312	8.59087e-10	2.16529e-08	11.8828
LTF	-3.68345	6.39464	-10.1759	6.51658e-18	1.20448e-15	30.2174
HLA-DRA	-3.19772	8.59323	-5.97189	2.45482e-08	4.00352e-07	8.6186
CD14	-3.18157	6.36448	-8.65498	2.6616e-14	2.42668e-12	22.0487
RNASE2	-3.17188	8.87062	-15.6023	1.18744e-30	1.31687e-27	59.0087
RNASE3	-3.16441	7.97274	-9.83884	4.16892e-17	6.60477e-15	28.3933
IGLV6-57	-2.95229	6.51397	-7.30554	3.32852e-11	1.19075e-09	15.0589
VCAM1	-2.92153	8.99611	-8.64265	2.84462e-14	2.42668e-12	21.9834
LGMN	-2.79784	7.97889	-5.8597	4.16029e-08	6.49825e-07	8.10633
CD81	-2.76311	8.78525	-6.16753	9.67007e-09	1.78735e-07	9.52425
HLA-DPA1	-2.75913	8.67443	-8.36086	1.29388e-13	7.97175e-12	20.4969
NOD2	-2.71549	5.76503	-7.13409	8.01365e-11	2.77723e-09	14.1996
SDC3	-2.6074	6.47773	-6.85853	3.23587e-10	8.75264e-09	12.8359
S100A8	-2.60587	9.48425	-7.07334	1.09209e-10	3.56216e-09	13.897
CXCL12	-2.57899	9.4256	-7.64162	5.8253e-12	2.30724e-10	16.7649
A2M	-2.53962	7.89794	-6.6369	9.78472e-10	2.41139e-08	11.7559
HMOX1	-2.52965	9.55482	-8.23012	2.60249e-13	1.51903e-11	19.8114
CCL18	-2.45847	7.59793	-6.50418	1.88426e-09	4.27127e-08	11.1169
IGLV1-44	-2.36831	12.3905	-5.21203	7.87944e-07	9.1024e-06	5.25944
CAMP	-2.35059	7.16476	-7.753	3.25129e-12	1.44227e-10	17.3361
C5AR1	-2.30737	6.62502	-6.60688	1.13539e-09	2.73728e-08	11.6108
CXCL2	-2.30222	5.93034	-6.38301	3.4101e-09	7.13547e-08	10.5389
S100A9	-2.20788	8.82892	-6.83545	3.6335e-10	9.59418e-09	12.7227
HLA-DPB1	-2.20498	9.13877	-7.11613	8.78268e-11	2.95151e-09	14.11
SYK	-2.17959	6.26434	-4.96806	2.26859e-06	2.35128e-05	4.24064
S100P	-2.15184	6.49311	-6.59759	1.1888e-09	2.80505e-08	11.566
IL4R	-2.14802	6.65003	-8.05671	6.54705e-13	3.30031e-11	18.9067
PLTP	-2.1363	7.75108	-3.30629	0.00124747	0.00532095	-1.74055
FABP4	-2.07638	7.26329	-6.50386	1.88722e-09	4.27127e-08	11.1154
TMSB4X	-2.02751	10.8347	-3.72736	0.000296596	0.00157381	-0.400309
MPO	-1.97652	7.00099	-11.0901	4.19299e-20	1.57473e-17	35.1777
CSF1R	-1.97506	7.8279	-6.44575	2.50985e-09	5.56686e-08	10.8375
PTPRC	-1.9588	7.4011	-5.49446	2.23557e-07	3.13828e-06	6.47666
CD19	-1.94876	7.49183	-5.18444	8.89339e-07	9.9624e-06	5.14267
S100A12	-1.93701	8.79673	-9.04712	3.17784e-15	3.53499e-13	24.1355
NRP1	-1.90567	5.86096	-8.49491	6.30296e-14	4.36874e-12	21.2026
HLA-DMA	-1.8925	9.35291	-6.96115	1.92894e-10	5.62945e-09	13.3411
IL18	-1.78953	5.16785	-4.88732	3.19809e-06	3.22426e-05	3.91048
CTSB	-1.76026	9.77719	-8.10407	5.0914e-13	2.68874e-11	19.1533
LCN2	-1.75326	7.78605	-7.88199	1.64967e-12	7.62286e-11	18.0009
DEFA4	-1.70391	8.79625	-10.6586	4.5424e-19	1.25938e-16	32.8356
CTSL	-1.70247	8.24243	-5.42305	3.08472e-07	3.97785e-06	6.16524
HLA-DRB4	-1.6786	4.68739	-4.7647	5.35263e-06	5.25316e-05	3.41598
ROBO3	-1.63717	5.77989	-6.93412	2.21125e-10	6.28788e-09	13.2077
CD79A	-1.62038	10.4495	-3.51318	0.000625147	0.00293766	-1.09829
PRTN3	-1.60049	7.39013	-4.93716	2.58831e-06	2.63343e-05	4.11383
IGHG1	-1.58085	8.53342	-3.50839	0.000635448	0.00296097	-1.11354
IL10RA	-1.55919	9.17025	-6.24176	6.7656e-09	1.36419e-07	9.8718
TYROBP	-1.52635	8.39911	-6.81123	4.1029e-10	1.05817e-08	12.6041
CCL2	-1.52065	5.18754	-6.1929	8.56095e-09	1.66563e-07	9.64276
CETP	-1.49633	5.11358	-5.24411	6.84169e-07	7.98677e-06	5.39571
FABP5	-1.47549	7.85105	-2.85381	0.00509021	0.0170545	-3.03017
ITGB2	-1.46609	8.45869	-8.81258	1.1353e-14	1.14459e-12	22.8851
FCGRT	-1.4339	8.51068	-3.35692	0.0010563	0.00461197	-1.58635
SEMA3B	-1.42006	6.44017	-4.7441	5.83204e-06	5.57564e-05	3.3337
RASGRP3	-1.40689	9.18477	-2.8203	0.00561576	0.0181571	-3.11918
FCER1G	-1.40579	9.23909	-8.57129	4.17905e-14	3.3104e-12	21.6059
MAP3K8	-1.36535	5.53367	-4.57542	1.16676e-05	0.000101089	2.66953
CTSG	-1.36397	8.11037	-5.99281	2.22358e-08	3.85306e-07	8.71471
PTGER4	-1.36364	6.55691	-5.47964	2.39048e-07	3.28018e-06	6.41184
CMA1	-1.30771	6.64774	-4.4248	2.13852e-05	0.000174384	2.09073
CCL8	-1.27395	7.16017	-3.79224	0.000235223	0.00130152	-0.182389
PPARG	-1.26496	5.27646	-4.37926	2.56187e-05	0.000201497	1.91847
TNFRSF1B	-1.25993	5.81337	-4.12191	6.94958e-05	0.000485228	0.969523
TNFRSF4	-1.24996	6.86405	-4.2454	4.32636e-05	0.000322009	1.4196
CSF3R	-1.23384	6.58044	-3.96951	0.00012315	0.000775986	0.427846
LCP2	-1.21534	6.64566	-3.57292	0.000509328	0.0024883	-0.906951
IL25	-1.19866	6.11704	-4.55834	1.25055e-05	0.000106682	2.6032
HLA-DQA1	-1.17189	5.30911	-3.63752	0.000407006	0.00206105	-0.697106
TNFSF13	-1.16719	7.38817	-3.03562	0.00294448	0.0108848	-2.53143
S1PR2	-1.16602	5.95667	-3.828	0.000206768	0.00118811	-0.0610273
IGKC	-1.15964	12.9842	-2.83396	0.00539578	0.0177476	-3.083
HCK	-1.15701	7.61695	-5.04415	1.63642e-06	1.76193e-05	4.55502
PLXND1	-1.14971	7.43719	-5.47915	2.3958e-07	3.28018e-06	6.40969
ABCC4	-1.1462	7.08144	-2.77548	0.00639612	0.0200376	-3.23678
AZU1	-1.11951	7.5396	-5.18977	8.68791e-07	9.83152e-06	5.16521
SLC22A17	-1.10966	7.43861	-4.27639	3.83576e-05	0.000289378	1.53407
AQP9	-1.10221	5.95658	-4.7576	5.51339e-06	5.34611e-05	3.38759
PDGFC	-1.09855	7.52341	-4.11595	7.10888e-05	0.000489674	0.948031
PGLYRP1	-1.09075	5.54887	-4.23512	4.502e-05	0.000330643	1.38176
MSR1	-1.07849	6.60722	-7.03212	1.3465e-10	4.26649e-09	13.6924
TNFRSF1A	-1.07747	7.74702	-3.9203	0.000147677	0.000885264	0.256301
CD4	-1.06604	7.46987	-3.65079	0.000388554	0.00197664	-0.653644
CDH1	-1.06077	5.41861	-2.71475	0.00761105	0.0228744	-3.39346
FOS	-1.05937	13.1695	-3.78822	0.000238644	0.00130373	-0.195976
CR2	-1.05359	6.09966	-2.88476	0.00464516	0.0159119	-2.94714
CCL24	-1.05123	5.94264	-3.93948	0.000137607	0.000843129	0.322982
BLNK	-1.05073	10.3405	-4.42221	2.1606e-05	0.000174898	2.08092
HLA-DQB1	-1.03041	8.0458	-6.39997	3.13933e-09	6.69523e-08	10.6195
GLP2R	-1.01076	5.73232	-3.97131	0.000122329	0.000775986	0.434168
JUN	-1.00664	11.8313	-4.41115	2.25776e-05	0.000181439	2.03897
C3AR1	-1.00329	8.1418	-5.97651	2.40179e-08	4.00352e-07	8.63981
CKLF	1.00274	8.9317	5.63099	1.20033e-07	1.79294e-06	7.07879
RFXANK	1.01456	9.1398	5.53621	1.84995e-07	2.69947e-06	6.6599
CD8A	1.01641	6.78394	3.13707	0.00214716	0.00852468	-2.2417
MBL2	1.019	4.92426	3.34385	0.00110282	0.00479617	-1.62633
TNFRSF17	1.02489	12.8997	5.972	2.45351e-08	4.00352e-07	8.61911
MIF	1.03177	12.7884	5.34748	4.32613e-07	5.33076e-06	5.83833
BST2	1.05714	11.1298	5.16466	9.69747e-07	1.07545e-05	5.0592
CALCRL	1.05885	7.3513	3.93643	0.000139168	0.000848005	0.312334
GPI	1.06496	10.9839	5.72483	7.79168e-08	1.1837e-06	7.49761
PSMC3	1.07981	9.61398	5.03156	1.72768e-06	1.82475e-05	4.50277
TNFSF10	1.12629	8.97253	3.30124	0.00126824	0.00538881	-1.75584
SEMA6B	1.1275	7.50167	5.25836	6.42465e-07	7.57972e-06	5.45642
SOD1	1.14709	11.9929	8.51127	5.77243e-14	4.26775e-12	21.2889
RFX5	1.15191	9.73314	7.62273	6.42927e-12	2.45864e-10	16.6683
PSMB8	1.17407	9.78637	4.07437	8.32037e-05	0.000566091	0.79888
DES	1.18043	6.49933	5.52864	1.91474e-07	2.75773e-06	6.62658
PPIA	1.19687	14.2671	8.13306	4.36434e-13	2.42003e-11	19.3044
TAP1	1.22282	10.4939	6.31718	4.69701e-09	9.64626e-08	10.227
LIFR	1.25033	5.4241	3.77495	0.000250285	0.00136062	-0.240767
PSMD8	1.26073	10.1553	6.19293	8.55956e-09	1.66563e-07	9.64292
OPRK1	1.26763	7.29355	5.3264	4.75196e-07	5.79113e-06	5.74763
CCL27	1.26897	6.71564	5.0921	1.32998e-06	1.44603e-05	4.75472
MX1	1.29319	10.993	3.80358	0.00022582	0.00127124	-0.144005
FGF13	1.30254	7.04677	2.57636	0.0111971	0.031044	-3.73907
PROCR	1.30324	5.95007	4.97247	2.22626e-06	2.32917e-05	4.25876
MAP2K2	1.33334	9.64212	7.99915	8.88237e-13	4.28284e-11	18.6077
MC4R	1.33671	8.64132	3.33569	0.00113286	0.00490757	-1.65125
WNT5A	1.36578	8.23518	3.20241	0.00174517	0.00716814	-2.05081
CD48	1.37337	12.8146	4.81859	4.27255e-06	4.2687e-05	3.63227
NRG2	1.37379	6.8553	3.79545	0.00023253	0.00129586	-0.171558
CALCR	1.38265	6.37607	6.97804	1.77108e-10	5.30846e-09	13.4246
TAC1	1.47695	5.05017	4.1936	5.28394e-05	0.000380513	1.22958
IFITM1	1.48834	12.5084	4.35316	2.83974e-05	0.000220229	1.82033
ESRRG	1.55431	7.72575	5.20562	8.10448e-07	9.26585e-06	5.23227
ADM	1.62586	10.8212	4.15246	6.1861e-05	0.00043984	1.07993
ISG15	1.63392	10.8315	4.36377	2.72352e-05	0.000212703	1.86015
AEN	1.64025	9.42004	9.04656	3.18754e-15	3.53499e-13	24.1325
HGF	1.67057	8.01939	4.50117	1.5754e-05	0.000130382	2.38249
INHBE	1.72944	6.68219	4.58808	1.10819e-05	9.67703e-05	2.7188
AZGP1	1.89266	7.21044	3.21221	0.00169132	0.00699879	-2.0219
CD320	2.02754	8.59685	6.18492	8.89561e-09	1.7009e-07	9.60546
DKK1	3.15072	9.88027	6.17748	9.21915e-09	1.73289e-07	9.5707
EDNRB	3.17564	9.42775	4.73802	5.98114e-06	5.62125e-05	3.3095
